# Supplementary material for: Clinical management and outcome of refractory asthma in the UK from the British Thoracic Society Difficult Asthma Registry
Source: PubMed Central journal article supplement — Thorax. 2012 May 11;67(8):754–6. doi: 10.1136/thoraxjnl-2012-201869 (PMC3402747; doi:10.1136/thoraxjnl-2012-201869), 2012-05-11
Supplement: thoraxjnl-2012-201869-s1.pdf [file thoraxjnl-2012-201869-s1.pdf]

## Supplementary Appendix 1

**Baseline characteristics of cohort with follow-up data; patient demographic data, healthcare utilisation and medication** – group data (mean  $\pm$  SD or median [inter-quartile range]) for all subjects is presented in column 1 followed by data for individual Centres. All patients satisfied the American Thoracic Society definition of refractory asthma (Proceedings of the ATS workshop on refractory asthma:current understanding, recommendations and unanswered questions. American Thoracic Society. Am J Respir Crit Care Med 2000 Dec;162(6):2341-2351). Comparisons were made using one-way analysis of variance or a Kruskal-Wallis analysis of variance of ranks - significance was taken as  $p < 0.05$

|                                                           | <b>All<br/>(349)</b> | <b>Belfast<br/>(89)</b> | <b>Brompton<br/>(92)</b> | <b>Leicester<br/>(73)</b> | <b>Manchester<br/>(95)</b> |         |
|-----------------------------------------------------------|----------------------|-------------------------|--------------------------|---------------------------|----------------------------|---------|
| <b>Female (%)</b>                                         | 222 (64)             | 55 (62)                 | 59 (64)                  | 41 (56)                   | 67 (71)                    | P=0.28  |
| <b>Race White (%)</b>                                     | 315 (90.3)           | 89 (100)                | 75 (81.5)                | 60 (82.2)                 | 91 (95.8)                  | P<0.001 |
| <b>Age (y) First Assessed at Difficult Asthma Service</b> | 44.8 $\pm$ 13.6      | 43.2 $\pm$ 14.2         | 43.0 $\pm$ 12.6          | 45.2 $\pm$ 13.2           | 47.7 $\pm$ 13.9            | P=0.07  |
| <b>Age (y) asthma diagnosed</b>                           | 16 [3 – 35]          | 20 [2 – 38]             | 10 [2 -27]               | 24 [5 – 42]               | 18 [5 – 33]                | P=0.04  |
| <b>Height (m)</b>                                         | 1.66 $\pm$ 0.10      | 1.65 $\pm$ 0.08         | 1.68 $\pm$ 0.10          | 1.66 $\pm$ 0.11           | 1.65 $\pm$ 0.09            | P=0.08  |
| <b>Weight (kg)</b>                                        | 81.5 $\pm$ 20.0      | 81.1 $\pm$ 19.5         | 84.8 $\pm$ 18.4          | 82.4 $\pm$ 23.6           | 78.0 $\pm$ 18.7            | P=0.13  |
| <b>BMI (kg/m<sup>2</sup>)</b>                             | 29.1 $\pm$ 6.4       | 29.3 $\pm$ 6.3          | 29.6 $\pm$ 6.0           | 29.7 $\pm$ 7.1            | 28.1 $\pm$ 6.2             | P=0.32  |
| <b>Smoking status</b>                                     |                      |                         |                          |                           |                            |         |
| <b>Never (%)</b>                                          | 210 (60.2)           | 55(61.8)                | 63(68.5)                 | 45 (61.6)                 | 47 (49.5)                  | P=0.13  |
| <b>Ex-smoker (%)</b>                                      | 108 (30.9)           | 26 (29.2)               | 24 (26.1)                | 23 (31.5)                 | 35 (36.8)                  |         |
| <b>(years since stopped)</b>                              | (9.4 $\pm$ 8.0)      | (10.3 $\pm$ 9.0)        | (10.6 $\pm$ 7.2)         | (11.0 $\pm$ 8.1)          | (6.2 $\pm$ 6.8)            |         |
| <b>Current smoker (%)</b>                                 | 19 (5.4)             | 6 (6.7)                 | 2 (2.2)                  | 5 (6.8)                   | 6 (6.3)                    |         |
| <b>(pack years)</b>                                       | (14.6 $\pm$ 14.9)    | (23.9 $\pm$ 24.8)       | (10.2 $\pm$ 8.4)         | (11.9 $\pm$ 10.2)         | (13.8 $\pm$ 11.0)          |         |
| <b>Unknown</b>                                            | 12 (3.4)             | 2 (2.2)                 | 3 (3.3)                  | 0                         | 7 (7.4)                    |         |
| <b>Unscheduled visits in preceding 12 months (n)</b>      | 4 [2 – 6]<br>(339)   | 5 [2 – 9]<br>(86)       | 4 [1.5 – 6]<br>(89)      | 4 [2 – 6]<br>(73)         | 3 [2 – 5]<br>(91)          | P=0.01  |
| <b>Rescue Steroid Courses</b>                             | 4 [2 – 6]            | 4 [1 – 6]               | 5 [2 – 7.5]              | 5 [2.5 – 6]               | 2 [0 – 4]                  | P<0.001 |

|                                                       |                             |                            |                            |                            |                            |         |
|-------------------------------------------------------|-----------------------------|----------------------------|----------------------------|----------------------------|----------------------------|---------|
| <b>In The Previous Year (n)</b>                       | (322)                       | (78)                       | (81)                       | (73)                       | (90)                       |         |
| <b>Hospital admissions in preceding 12 months (n)</b> | 0 [0 – 2]<br>(344)          | 0 [0 – 1]<br>(87)          | 1 [0 – 3]<br>(92)          | 0 [0 – 1]<br>(73)          | 0 [0 – 1]<br>(92)          | P<0.001 |
| <b>Total number of ITU admission (n)</b>              | 0 [0 – 0]<br>(345)          | 0 [0 – 0]<br>(87)          | 0[0 – 1]<br>(92)           | 0 [0 – 0]<br>(73)          | 0[0 – 0]<br>(93)           | P=0.004 |
| <b>Maintenance Oral Steroids (%)</b>                  | 143 / 348<br>(41%)          | 32 / 89<br>(36%)           | 51 / 91<br>(56%)           | 28 / 73<br>(38%)           | 32 / 95<br>(34%)           | P=0.008 |
| <b>Oral Steroid Dose (mg) (n)</b>                     | 15 [10 – 20]<br>(140)       | 15 [6 – 20]<br>(31)        | 19 [10 – 20]<br>(52)       | 10 [8 – 15]<br>(28)        | 15 [10 – 30]<br>(29)       | P=0.06  |
| <b>BDP Equivalent Dose (ug) (n)</b>                   | 2000 [1000 – 2000]<br>(333) | 1600 [1000 – 2000]<br>(87) | 2000 [2000 – 2000]<br>(88) | 2000 [1600 – 2000]<br>(73) | 1200 [1000 – 2000]<br>(85) | P<0.001 |
| <b>SABA use per day</b>                               | 6 [4 – 8]<br>(238)          | 8 [4 – 9]<br>(29)          | 6 [4 – 8]<br>(68)          | 4 [2 – 9]<br>(57)          | 8 [5.25 – 10]<br>(84)      | P=0.003 |
| <b>LABA use(%)</b>                                    | 324/330<br>(98%)            | 87/88<br>(99%)             | 89/90<br>(99%)             | 66/70<br>(94%)             | 82/82<br>(100%)            | P=0.047 |
| <b>Theophylline n (%)</b>                             | 132 / 345<br>(38%)          | 36 / 89<br>(40%)           | 48 / 90<br>(53%)           | 24 / 73<br>(33%)           | 24 / 93<br>(26%)           | P=0.001 |
| <b>Nebuliser Use (%)</b>                              | 149 / 344<br>(43%)          | 42 / 88<br>(48%)           | 58 / 90<br>(64%)           | 18 / 73<br>(25%)           | 31 / 93<br>(33%)           | P<0.001 |
| <b>Any Steroid Sparing Medications</b>                | 4 / 344 (1%)                | 1 / 86 (1%)                | 0 / 89 (0%)                | 1 / 73 (1%)                | 2 / 90 (2%)                | P=0.514 |
| <b>Anti-IgE Treatment n (%)</b>                       | 3 / 346<br>(1%)             | 0<br>(0%)                  | 0<br>(0%)                  | 0<br>(0%)                  | 3<br>(3%)                  | P=0.044 |
| <b>PPI (%)</b>                                        | 99 / 346<br>(29%)           | 25 / 89<br>(28%)           | 30 / 90<br>(33%)           | 17 / 73<br>(23%)           | 27 / 94<br>(29%)           | P=0.571 |
| <b>Aspirin / NSAID Sensitivity n (%)</b>              | 32/334 (10%)                | 7/87 (8%)                  | 6/85 (7%)                  | 9/70 (13%)                 | 10/92 (11%)                | P=0.59  |
| <b>Anti-histamine n (%)</b>                           | 80/342 (23%)                | 15/88 (17%)                | 24/89 (27%)                | 14/72 (19%)                | 27/93 (29%)                | P=0.18  |
| <b>Nasal Steroids n (%)</b>                           | 84/342 (25%)                | 26/88 (30%)                | 21/89 (24%)                | 13/72 (18%)                | 24/93 (26%)                | P=0.40  |
| <b>Leukotriene Receptor Antagonists n (%)</b>         | 125/343 (36%)               | 48/88 (55%)                | 38/89 (43%)                | 21/73 (29%)                | 18/93 (19%)                | P<0.001 |

|                                                             |                |               |               |               |               |         |
|-------------------------------------------------------------|----------------|---------------|---------------|---------------|---------------|---------|
| <b>Pre-bronchodilator spirometry (n)</b>                    | (338)          | (89)          | (89)          | (71)          | (89)          |         |
| <b>FEV<sub>1</sub> (L)</b>                                  | 1.95 ± 0.82    | 1.94 ± 0.70   | 1.85 ± .079   | 2.20 ± 0.87   | 1.86 ± 0.90   | P=0.03  |
| <b>% predicted</b>                                          | 66.0 ± 23.7    | 66.8 ± 23.9   | 59.9 ± 20.6   | 74.1 ± 22.8   | 65.5 ± 25.7   | P=0.004 |
| <b>FVC (L)</b>                                              | 3.09 ± 1.04    | 3.08 ± 0.89   | 3.25 ± 1.09   | 3.13 ± 1.12   | 2.91 ± 1.05   | P=0.19  |
| <b>% predicted</b>                                          | 82.1 ± 20.0    | 82.9 ± 20.1   | 83.0 ± 18.3   | 82.6 ± 21.6   | 79.9 ± 20.5   | P=0.70  |
| <b>FEV<sub>1</sub> / FVC ratio %</b>                        | 63.0 ± 15.1    | 63.4 ± 14.9   | 55.7 ± 14.5   | 70.6 ± 13.2   | 63.5 ± 14.4   | P<0.001 |
| <b>Subjects with baseline post-bronchodilator study (n)</b> | (239)          | (57)          | (44)          | (69)          | (69)          |         |
| <b>PreBronchodilatorFEV<sub>1</sub> (L)</b>                 | 1.91 ± 0.84    | 1.69 ± 0.63   | 1.83 ± 0.81   | 2.20 ± 0.87   | 1.84 ± 0.91   | P=0.004 |
| <b>(% predicted)</b>                                        | (64.3± 23.2)   | (58.0 ± 18.6) | (58.8 ± 20.9) | (74.1 ± 23.1) | (64.0 ± 25.3) | P<0.001 |
| <b>Pre-Bronchodilator FVC (L)</b>                           | 3.07 ± 1.09    | 2.99 ± 0.96   | 3.34 ± 1.18   | 3.13 ± 1.13   | 2.92 ± 1.08   | P=0.24  |
| <b>(% predicted)</b>                                        | (81.1 ± 20.2)  | (80.1 ± 19.5) | (83.9 ± 18.5) | (82.8 ± 21.9) | (79.0± 20.4)  | P=0.57  |
| <b>Post-bronchodilator FEV<sub>1</sub> (L)</b>              | 2.19 ± 0.89    | 1.94 ± 0.68   | 2.29 ± 1.04   | 2.37 ± 0.87   | 2.15 ± 0.91   | P=0.04  |
| <b>(% predicted)</b>                                        | (74.1 ± 24.0 ) | (66.7 ± 20.9) | (74.1 ± 26.6) | (80.0± 22.8)  | (75.1 ± 24.7) | P=0.03  |
| <b>Post-Bronchodilator FVC (L)</b>                          | 3.32 ± 1.09    | 3.21 ± 0.93   | 3.64 ± 1.29   | 3.30 ± 1.13   | 3.24 ± 1.02   | P=0.22  |
| <b>(% predicted)</b>                                        | (88.1± 19.2)   | (86.5 ± 18.8) | (91.2 ± 21.3) | (87.7 ± 20.8) | (87.8 ± 17.0) | P=0.70  |
| <b>Post-bronchodilator FEV<sub>1</sub>/FVC ratio (%)</b>    | 65.6 ± 14.3    | 61.1 ± 12.6   | 61.6 ± 15.6   | 71.7 ± 12.1   | 65.4 ± 14.9   | P<0.001 |

**Supplementary appendix 2- Lung function and healthcare outcomes of cohort with follow-up data by Clinical Centre** – group data (mean  $\pm$  SD or median [inter-quartile range]) for all subjects is presented in column 1 followed by data for individual Centres. Comparisons were made using paired analysis (paired t-test or Wilcoxon test as appropriate) - significance was taken as  $P < 0.05$ .

|                                                                          | <b>All<br/>(349)</b>     | <b>Belfast<br/>(89)</b> | <b>Brompton<br/>(92)</b> | <b>Leicester<br/>(73)</b> | <b>Manchester<br/>(95)</b> |         |
|--------------------------------------------------------------------------|--------------------------|-------------------------|--------------------------|---------------------------|----------------------------|---------|
| <b>Pre-<br/>bronchodilator<br/>FEV1<br/>%predicted (n)</b>               | 72.7 $\pm$ 27.7<br>(273) | 81.8 $\pm$ 22.5<br>(83) | 62.8 $\pm$ 23.5<br>(67)  | 76.1 $\pm$ 25.5<br>(70)   | 66.4 $\pm$ 36.6<br>(53)    | P<0.001 |
| <b>FVC %<br/>predicted(n)</b>                                            | 86.3 $\pm$ 21.6<br>(263) | 95 $\pm$ 18.5<br>(83)   | 78.7 $\pm$ 20.8<br>(66)  | 83.2 $\pm$ 22<br>(69)     | 85.9 $\pm$ 22.8<br>(45)    | P<0.001 |
| <b>Post<br/>bronchodilator<br/>FEV1 %<br/>predicted (n)</b>              | 73.8 $\pm$ 32.5<br>(110) | 88.8 $\pm$ 38.5<br>(6)  | 57.8 $\pm$ 39.7<br>(23)  | 79.4 $\pm$ 26.7<br>(69)   | 65.1 $\pm$ 35.8<br>(12)    | P<0.05  |
| <b>Post<br/>bronchodilator<br/>FVC %predicted<br/>(n)</b>                | 83.8 $\pm$ 26.6<br>(101) | 80.5 $\pm$ 42.1<br>(6)  | 81.4 $\pm$ 26.7<br>(17)  | 83 $\pm$ 26.3<br>(68)     | 95.3 $\pm$ 16.3<br>(10)    | P=0.543 |
| <b>Unscheduled<br/>visits in<br/>preceding 12<br/>months (n)</b>         | 2 [0 – 6]<br>(324)       | 1 [0 – 3]<br>(86)       | 1 [0–4.25]<br>(86)       | 0 [0 – 1]<br>(70)         | 10 [6 – 13]<br>(82)        | P<0.001 |
| <b>Rescue Steroid<br/>Courses in the<br/>preceding 12<br/>months (n)</b> | 2[0 - 4]<br>(326)        | 2 [0 – 4]<br>(85)       | 2 [1 – 5]<br>(88)        | 2 [1 – 4]<br>(71)         | 2 [0 – 4]<br>(82)          | P=0.507 |
| <b>Hospital<br/>admissions in<br/>preceding 12</b>                       | 0 [0 – 1]                | 0 [0 – 1]               | 0 [0 – 1.5]              | 0 [0 – 0]                 | 0 [0 – 1]                  | P<0.01  |

|                                            |                              |                              |                              |                               |                               |         |
|--------------------------------------------|------------------------------|------------------------------|------------------------------|-------------------------------|-------------------------------|---------|
| <b>months (n)</b>                          | (329)                        | (87)                         | (89)                         | (71)                          | (82)                          |         |
| <b>BDP Equivalent<br/>Dose, ug<br/>(n)</b> | 2000<br>[1000-2000]<br>(341) | 1600<br>[800 – 2000]<br>(88) | 2000<br>[2000 -2000]<br>(90) | 1600<br>[1600 – 2000]<br>(69) | 2000<br>[1000 – 2000]<br>(94) | P<0.001 |
| <b>SABA use per<br/>day</b>                | 7 [4 – 10]<br>(242)          | 7[4 – 9]<br>(21)             | 4 [2 – 8]<br>(71)            | 6 [2 – 10]<br>(59)            | 8 [6 – 10]<br>(91)            | P<0.001 |

### Supplementary Appendix 3

**Steroid sparing strategies by Centre** – the denominator for steroid sparing strategies is 224 (patients who were on maintenance oral steroids either at baseline or follow-up).

|                                     | <b>All<br/>(n=224)</b> | <b>Belfast<br/>(n= 55)</b> | <b>Brompton<br/>(n=67)</b> | <b>Leicester<br/>(n=47)</b> | <b>Manchester<br/>(n=55)</b> |         |
|-------------------------------------|------------------------|----------------------------|----------------------------|-----------------------------|------------------------------|---------|
| <b>Methotrexate</b>                 |                        |                            |                            |                             |                              |         |
| <b>Tried</b>                        | 47 (31%)               | 8 (15%)                    | 3 (5%)                     | 22 (47)                     | 14 (25%)                     | P<0.001 |
| <b>Success</b>                      | 12 (26%)               | 0 (0%)                     | 2 (67%)                    | 4 (18%)                     | 6 (43%)                      |         |
| <b>Cyclosporin</b>                  |                        |                            |                            |                             |                              |         |
| <b>Tried</b>                        | 23 (10%)               | 9 (14%)                    | 7 (10%)                    | 2 (4%)                      | 5 (9%)                       | P=0.27  |
| <b>Success</b>                      | 7 (30%)                | 3 (33%)                    | 2 (29%)                    | 0 (0%)                      | 2 (40%)                      |         |
| <b>Mycophenolate</b>                |                        |                            |                            |                             |                              |         |
| <b>Tried</b>                        | 3 (1%)                 | 2 (4%)                     | 0 (0%)                     | 0 (0%)                      | 1 (2%)                       | -       |
| <b>Success</b>                      | 2 (67%)                | 2 (100%)                   | -                          | -                           | 0 (0%)                       |         |
| <b>Azathioprine</b>                 |                        |                            |                            |                             |                              |         |
| <b>Tried</b>                        | 11 (5%)                | 1 (2%)                     | 2 (3%)                     | 3 (6%)                      | 5 (9%)                       | P=0.27  |
| <b>Success</b>                      | 3 (27%)                | 0 (0%)                     | 1 (50%)                    | 2 (67%)                     | 0 (0%)                       |         |
| <b>Any steroid sparing strategy</b> |                        |                            |                            |                             |                              |         |
| <b>Tried</b>                        | 64 (29%)               | 15 (27%)                   | 10 (15%)                   | 23 (49%)                    | 16 (29%)                     | P=0.001 |

## Supplementary Appendix 4

Additional therapeutic options by centre- the denominator for other strategies is 349 (all subjects).

|                                  | <b>All<br/>(n=349)</b> | <b>Belfast<br/>(n= 89)</b> | <b>Brompton<br/>(n=92)</b> | <b>Leicester<br/>(n=73)</b> | <b>Manchester<br/>(n=95)</b> |         |
|----------------------------------|------------------------|----------------------------|----------------------------|-----------------------------|------------------------------|---------|
| <b>Itraconazole</b>              |                        |                            |                            |                             |                              |         |
| <b>Tried</b>                     | 18 (5%)                | 1 (1%)                     | 1 (1%)                     | 2 (3%)                      | 14 (15%)                     | P<0.001 |
| <b>Success</b>                   | 14 (78%)               | 0 (0%)                     | 0 (0%)                     | 1 (50%)                     | 12 (86%)                     |         |
| <b>Subcutaneous<br/>Bricanyl</b> |                        |                            |                            |                             |                              |         |
| <b>Tried</b>                     | 15 (4%)                | 1 (1%)                     | 12 (13%)                   | 0 (0%)                      | 2 (2%)                       | P<0.001 |
| <b>Success</b>                   | 6 (40%)                | 1 (100%)                   | 5 (42%)                    | -                           | 0 (0%)                       |         |
| <b>IV Aminophylline</b>          |                        |                            |                            |                             |                              |         |
| <b>Tried</b>                     | 28 (8%)                | 1 (1%)                     | 21 (23%)                   | 1 (1%)                      | 5 (5%)                       | P<0.001 |
| <b>Success</b>                   | 22 (79%)               | 0 (0%)                     | 16 (76%)                   | 1 (100%)                    | 5 (100%)                     |         |
| <b>SMART</b>                     |                        |                            |                            |                             |                              |         |
| <b>Tried</b>                     | 85 (24%)               | 21 (24%)                   | 3 (3%)                     | 15 (21%)                    | 46 (48%)                     | P<0.001 |
| <b>Success</b>                   | 75 (88%)               | 18 (86%)                   | 3 (100%)                   | 8 (53%)                     | 44 (96%)                     |         |
| <b>Omalizumab</b>                |                        |                            |                            |                             |                              |         |
| <b>Tried</b>                     | 59 (17%)               | 12 (13%)                   | 35 (38%)                   | 1 (1%)                      | 11 (12%)                     | P<0.001 |
| <b>Success</b>                   | 37 (63%)               | 7 (58%)                    | 23 (66%)                   | 0 (0%)                      | 7 (64%)                      |         |
